# Supplementary material for: A Simplified Integrative Approach to Assessing Productive Sustainability and Livelihoods in the “Amazonian Chakra” in Ecuador
Source: Preprints.org preprint supplement (doi:10.20944/preprints202410.2504.v1), 2024-10-31
Supplement: Supplementary file 1 [file supplementary]

**Supplementary Material Table 1:** List of 44 indicators corresponding to the 4 dimensions of the SAFA methodology used in this study.

| **SAFA– Dimensions (4) and Indicators (44)** | | |
| --- | --- | --- |
| **Indicator** | **Description** | **Acronym** |
| **Godd governance (14)** | | |
| Mission Explicitness | Clarity in the organization's mission, objectives, and guiding principles. | G1.1.1 |
| Mission Driven | Operations are consistently aligned with the organization's mission and goals. | G1.1.2 |
| Due Diligence | Systems to ensure compliance with legal, ethical, and operational standards. | G1.2.1 |
| Holistic Audits | Comprehensive audits covering social, environmental, and financial performance. | G2.1.1 |
| Responsibility | Accountability for social, environmental, and economic impacts of operations. | G2.2.1 |
| Transparency | Clear and accessible information on practices, impacts, and decisions. | G2.3.1 |
| Stakeholder Identification | Recognizing all stakeholders affected by or contributing to the organization. | G3.1.1 |
| Stakeholder Engagement | Active involvement of stakeholders in decision-making and operations. | G3.1.2 |
| Effective Participation | Ensuring meaningful input from stakeholders in processes and decisions. | G3.1.4 |
| Grievance Procedures | Mechanisms for addressing stakeholder complaints and resolving conflicts. | G3.2.1 |
| Remedy, Restoration/Prevention | Actions to repair, prevent, and mitigate harm caused by operations. | G4.2.1 |
| Responsibility | Responsibility for operational impacts on communities and ecosystems. | G4.3.1 |
| Sustainability Management Plan | A strategic plan to integrate sustainability into organizational operations. | G5.1.1 |
| Full-Cost Accounting | Accounting includes environmental, social, and economic costs. | G5.2.1 |
| **Ennvironmental integrity (15)** | | |
| GHG Reduction Target | Targets set for reducing greenhouse gas emissions. | E1.1.1 |
| GHG Mitigation Practices | Practices to reduce or offset greenhouse gas emissions. | E1.1.2 |
| Water Conservation Practices | Measures to reduce water use and preserve water resources. | E2.1.2 |
| Water Pollution Prevention Practices | Practices aimed at preventing contamination of water sources. | E2.2.2 |
| Land Conservation/Rehabilitation Plan | Strategic plans for restoring and conserving land resources. | E3.2.1 |
| Land Conservation/Rehabilitation Practices | Practices to restore and protect degraded land. | E3.2.2 |
| Ecosystem Connectivity | Maintaining or enhancing linkages between ecosystems. | E4.1.4 |
| Land-Use and Land-Cover Change | Monitoring and managing changes in land use and cover. | E4.1.5 |
| Species Conservation Practices | Practices aimed at preserving species and their habitats. | E4.2.2 |
| Diversity and Abundance of Key Species | Ensuring the diversity and population health of important species. | E4.2.3 |
| Diversity of Production | Promoting the diversification of agricultural production systems. | E4.2.4 |
| Wild Genetic Diversity Enhancing Practices | Practices that increase the genetic diversity of wild species. | E4.3.1 |
| Agro-Biodiversity in-situ Conservation | Conservation of agricultural biodiversity directly in ecosystems. | E4.3.2 |
| Renewable Energy Use Target | Setting targets for the use of renewable energy sources. | E5.2.1 |
| Energy-Saving Practices | Implementing practices that reduce energy consumption. | E5.2.2 |
| **Economic resilience (11)** | | |
| Community Investment | Investment in local community development and services. | C1.2.1 |
| Long Term Profitability | Ensuring sustained profitability over the long term. | C1.3.1 |
| Business Plan | Structured plans for organizational and financial management. | C1.3.2 |
| Net Income | Total revenue after all costs and expenses are deducted. | C1.4.1 |
| Cost of Production | Total costs incurred in producing goods or services. | C1.4.2 |
| Price Determination | Methods used to set product prices based on costs and market factors. | C1.4.3 |
| Product Diversification | Expanding the range of products to reduce risk and enhance revenue. | C2.1.2 |
| Stability of Market | Ensuring consistency and reliability in market access and demand. | C2.3.1 |
| Net Cash Flow | Total cash inflow minus outflow over a specific period. | C2.4.1 |
| Safety Nets | Mechanisms to protect against financial risks or market volatility. | C2.4.2 |
| Risk Management | Processes to identify, assess, and mitigate business risks. | C2.5.1 |
| **Social well-being (4)** | | |
| Fair Pricing and Transparent Contracts | Ensuring equitable pricing and clear contract terms for producers. | S2.1.1 |
| Safety and Health Training | Providing training on workplace safety and health standards. | S5.1.1 |
| Public Health | Promoting health and wellness within the community. | S5.2.1 |
| Indigenous Knowledge | Preserving and utilizing traditional knowledge in practices. | S6.1.1 |

**Supplementary Material Table 2:** List of 14 indicators of livelihood and income (SLF) methodology used in this study.

| **SLF– Capitals (5) and income (4) indicators** | | |
| --- | --- | --- |
| **Indicator** | **Description** | **Acronym** |
| *Human Capital (L-HC)* | | |
| Household head age (years) | Age of the head of the household. | L-HC.1 |
| Ethnicity (% Kichwa) | Percentage of households identifying as Kichwa. | L-HC.2 |
| Gender/Head of household (female%) | Percentage of households headed by females. | L-HC.3 |
| *Social Capital (L-SC)* | | |
| Training received (BMP) (%) | Percentage of individuals who received training in Best Management Practices (BMP). | L-SC.1 |
| *Natural Capital (L-NC)* | | |
| Total farm area (ha) | Total land area owned by the household. | L-NC.1 |
| Chakra (ha) | Area of land used for Chakra (traditional agroforestry system). | L-NC.2 |
| Forest (ha) | Area of forest land owned or managed by the household. | L-NC.3 |
| Other crops (ha) | Area used for other crop production. | L-NC.4 |
| *Finantial Capital (L-FC)* | | |
| Total income (USD) | Total household income from all sources. | L-FC.1 |
| Chakra income (USD) | Income derived specifically from Chakra-related activities. | L-FC.2 |
| Access to government bonus (%) | Percentage of households receiving government financial support. | L-FC.3 |
| Access to credit (%) | Percentage of households with access to credit or loans. | L-FC.4 |
| *Physical Capital (L-PhC)* | | |
| Engine technology (yes=1) | Whether the household uses engine-powered agricultural technology. | L-PhC.1 |
| Cell phone (yes=1) | Whether the household owns or uses a cell phone. | L-PhC.2 |
